# Supplementary material for: Quantitative Modeling Extends the Antibacterial Activity of Nitric Oxide
Source: Front Physiol. 2020 Apr 17;11:330. doi: 10.3389/fphys.2020.00330 (PMC7181900; doi:10.3389/fphys.2020.00330)
Supplement: Supplementary file 3 [file Table_3.XLSX]

## Sheet: Sheet1
#	Species Name	Description	Species Location	Initial Concentration (µM)	References/Notes
1	atp	Adenosine triphosphate	cell	9600†	[1]
2	adp	Adenosine diphosphate	cell	560†	[1]
3	amp	Adenosine monophosphate	cell	280†	[1]
4	ala	L-Alanine	cell	2600†	[1]
5	co2	Dissolved carbon dioxide (culture)	all	10.0687	[2]
6	co2_air	Dissoveled carbon dioxide (in equilibrum with air)	all	10.0687†	[3]
7	co3r	Carbonate radical	cell	0	Initial concentration assumed to be negligible.
8	co3	Carbonate anion	cell	0.224866	Based on equilibrium [co3][h]/[hco3]; equilibrium constant obtained from [4]
9	hco3	Bicarbonate	cell	120.344	Based on equilibrum [hco3][h]/[h2co3]; equilibrium constant calculated from rate constants in Table S2
10	h2co3	Carbonic acid	cell	0.0151032	Based on equlibrium [co2][h2o]/[hco3]; equilibrium constant calculated from rate constants in Table S2
11	h	Proton (intracellular)	cell	0.0251†	Estimated for an intracellular pH of 7.6
12	ex_h	Proton (extracellular)	media	0.0398†	Estimated for a media pH of 7.4
13	h2o	Water (intracellular)	cell	55600000†	Based on pure water at room temperature.
14	ex_h2o	Water (extracellular)	media	55600000†	Based on pure water at room temperature.
15	oh	hydroxide anion	cell	0.398†	Estimated for an intracellular pH of 7.6
16	cytbd	Cytochrome bd	cell	*	Refer to Table S5
17	cytbd_no	Inhibited (NO•-bound) cytochrome bd	cell	0	Initial concentration assumed to be negligible.
18	cytbo	Cytochrome bo	cell	*	Refer to Table S5
19	cytbo_no	Inhibited (NO•-bound) cytochrome bo	cell	0	Initial concentration assumed to be negligible.
20	cys	L-Cysteine	cell	98.5†	[5]
21	cysr	L-Cysteinyl radical	cell	0	Initial concentration assumed to be negligible.
22	cysno	S-Nitrosocysteine	cell	0	Initial concentration assumed to be negligible.
23	datp	Deoxyadenosine triphosphate	cell	181†	[6]
24	dctp	Deoxycytosine triphosphate	cell	184†	[6]
25	dgtp	Deoxyguanosine triphosphate	cell	92†	[6]
26	ds_dad_2	DNA-bound deoxyadenosine	cell	11946	[5]
27	ds_dcyt	DNA-bound deoxycytidine	cell	12329.4	[5]
28	ds_dgsn	DNA-bound deoxyguanosine	cell	12329.4	[5]
29	ds_APa	DNA AP site (missing adenine)	cell	0	Initial concentration assumed to be negligible.
30	ds_APc	DNA AP site (missing cytosine)	cell	0	Initial concentration assumed to be negligible.
31	ds_APg	DNA AP site (missing guanine)	cell	0	Initial concentration assumed to be negligible.
32	ds_gap_a	DNA backbone single nucleoside gap (missing deoxyadenosine)	cell	0	Initial concentration assumed to be negligible.
33	ds_gap_c	DNA backbone single nucleoside gap (missing deoxycytidine)	cell	0	Initial concentration assumed to be negligible.
34	ds_gap_g	DNA backbone single nucleoside gap (missing deoxyguanosine)	cell	0	Initial concentration assumed to be negligible.
35	ds_dad_2_nick	DNA backbone nick (adjacent to deoxyadenosine)	cell	0	Initial concentration assumed to be negligible.
36	ds_dcyt_nick	DNA backbone nick (adjacent to deoxycytidine)	cell	0	Initial concentration assumed to be negligible.
37	ds_dgsn_nick	DNA backbone nick (adjacent to deoxyguanosine)	cell	0	Initial concentration assumed to be negligible.
38	ds_din	DNA-bound deoxyinosine	cell	0	Initial concentration assumed to be negligible.
39	ds_duri	DNA-bound deoxyuridine	cell	0	Initial concentration assumed to be negligible.
40	ds_dxtsn	DNA-bound deoxyxanthosine	cell	0	Initial concentration assumed to be negligible.
41	hxan	Hypoxanthine	cell	0	Initial concentration set to zero because value does not influence reaction rates.
42	ura	Uracil	cell	0	Initial concentration set to zero because value does not influence reaction rates.
43	xan	Xanthine	cell	0	Initial concentration set to zero because value does not influence reaction rates.
44	dr5p	2-Deoxy-D-ribose 5-phosphate	cell	300†	[1]
45	pi	Phosphate ion	cell	0†	Initial concentration set to zero because value does not influence reaction rates.
46	ppi	Diphosphate	cell	0†	Initial concentration set to zero because value does not influence reaction rates.
47	alka	DNA glycosylase (inosine, xanthosine)	cell	0.0010†	[5]
48	ung	DNA glycosylase (uridine)	cell	0.0075†	[5]
49	xth	DNA exonuclease III	cell	0.0034†	[5]
50	dnapol	DNA polymerase I	cell	0.15†	[5]
51	dnalig	DNA ligase	cell	0.15†	[5]
52	gsan	Glutathione (anion)	cell	417	Using the reported GSH concentration of approximately 17 mM [1] and pKa of 9.2 [7], the initial GSH concentration was estimated for a pH of 7.6.
53	gsr	Glutathionyl radical	cell	0	Initial concentration assumed to be negligible.
54	gsh	Reduced glutathione	cell	16583	Using the reported GSH concentration of approximately 17 mM [1] and pKa of 9.2 [7], the initial GSH concentration was estimated for a pH of 7.6.
55	gsnhoh	GSH-HNO adduct	cell	0	Initial concentration assumed to be negligible.
56	gsno	S-Nitrosoglutathione	cell	0	Initial concentration assumed to be negligible.
57	gsno2	S-Nitroglutathione	cell	0	Initial concentration assumed to be negligible.
58	gsor	Glutathione sulfinyl radical	cell	0	Initial concentration assumed to be negligible.
59	gsoh	Glutathione sulfenic acid	cell	0	Initial concentration assumed to be negligible.
60	gsoo	Glutathione peroxysulfenyl radical	cell	0	Initial concentration assumed to be negligible.
61	gsoono2	GSOONO2	cell	0	Initial concentration assumed to be negligible.
62	gssg	Oxidized glutathione (disulfide)	cell	2400	[1]
63	gssgr	Oxidized glutathionyl radical	cell	0	Initial concentration assumed to be negligible.
64	gor	Glutathione reductase	cell	1.2†	[8]
65	gsfdh	Glutathione-dependent formaldehyde dehydrogenase	cell	3.94†	[5]
66	hmpFe2	Nitric oxide dioxygenase (FAD, ferrous)	cell	0	Initial concentration assumed to be negligible.
67	hmpFe3	Nitric oxide dioxygenase (FAD, ferric)	cell	*	Refer to Table S6
68	hmpFe2h	Nitric oxide dioxygenase (FADH, ferrous)	cell	**	Value set based on HMP equilibrium assumption, refer to Supplementary Methods for further details
69	hmpFe3h	Nitric oxide dioxygenase (FADH, ferric)	cell	0	Initial concentration assumed to be negligible.
70	hmpFe2h2	Nitric oxide dioxygenase (FADH2, ferrous)	cell	0	Initial concentration assumed to be negligible.
71	hmpFe3h2	Nitric oxide dioxygenase (FADH2, ferric)	cell	**	Value set based on HMP equilibrium assumption, refer to Supplementary Methods for further details
72	hmpFe2_o2	Nitric oxide dioxygenase (FAD, ferrous), O2-bound	cell	0	Initial concentration assumed to be negligible.
73	hmpFe2_no	Nitric oxide dioxygenase (FAD, ferrous), NO•-bound	cell	0	Initial concentration assumed to be negligible.
74	hmpFe3_onoo	Nitric oxide dioxygenase (FAD, ferric), ONOO−-bound	cell	0	Initial concentration assumed to be negligible.
75	hmpFe2h_o2	Nitric oxide dioxygenase (FADH, ferrous), O2-bound	cell	**	Value set based on HMP equilibrium assumption, refer to Supplementary Methods for further details
76	hmpFe2h_no	Nitric oxide dioxygenase (FADH, ferrous), NO•-bound	cell	0	Initial concentration assumed to be negligible.
77	hmpFe3h_onoo	Nitric oxide dioxygenase (FADH, ferric), ONOO−-bound	cell	0	Initial concentration assumed to be negligible.
78	hmpFe2h2_o2	Nitric oxide dioxygenase (FADH2, ferrous), O2-bound	cell	0	Initial concentration assumed to be negligible.
79	hmpFe2h2_no	Nitric oxide dioxygenase (FADH2, ferrous), NO•-bound	cell	0	Initial concentration assumed to be negligible.
80	hmpFe3h2_onoo	Nitric oxide dioxygenase (FADH2, ferric), ONOO−-bound	cell	0	Initial concentration assumed to be negligible.
81	NorVox	Nitric oxide reductase (oxidized flavorubredoxin)	cell	0	Initial concentration assumed to be negligible.
82	NorVred	Nitric oxide reductase (reduced flavorubredoxin)	cell	0	Initial concentration assumed to be negligible.
83	NrfA	Cytochrome c nitrite reductase	cell	0	Initial concentration assumed to be negligible.
84	n2	Dinitrogen	cell	0	Initial concentration set to zero because value does not influence reaction rates.
85	n2o	Nitrous oxide	cell	0	Initial concentration set to zero because value does not influence reaction rates.
86	n2o2r	Hyponitrite radical	cell	0	Initial concentration assumed to be negligible.
87	n2o3	Nitrous anhydride (intracellular)	cell	0	Initial concentration assumed to be negligible.
88	ex_n2o3	Nitrous anhydride (extracellular)	media	0	Initial concentration assumed to be negligible.
89	n2o4	Dinitrogen tetroxide (intracellular)	cell	0	Initial concentration assumed to be negligible.
90	ex_n2o4	Dinitrogen tetroxide (extracellular)	media	0	Initial concentration assumed to be negligible.
91	n3o3	Nitrosyl hyponitrite anion	cell	0	Initial concentration assumed to be negligible.
92	nmn	Nicotinamide mononucleotide	cell	0	Initial concentration set to zero because value does not influence reaction rates.
93	nad	Nicotinamide adenine dinucleotide (oxidized)	cell	2600†	[1]
94	nadh	Nicotinamide adenine dinucleotide (reduced)	cell	83†	[1]
95	nadp	NAD phosphate (oxidized)	cell	2.1†	[1]
96	nadph	NAD phosphate (reduced)	cell	120†	[1]
97	nh2oh	Hydroxylamine	cell	0	Initial concentration assumed to be negligible.
98	nh3	Ammonia	cell	0	Initial concentration set to zero because value does not influence reaction rates.
99	nh4	Ammonium	cell	0	Initial concentration set to zero because value does not influence reaction rates.
100	hno	Nitroxyl	cell	0	Initial concentration assumed to be negligible.
101	no	Nitric oxide	all	0	Initial concentration assumed to be negligible.
102	noan	Nitroxyl anion	cell	0	Initial concentration assumed to be negligible.
103	no2	Nitrite	cell	0	Initial concentration assumed to be negligible.
104	ex_no2	Nitrite	media	0	Initial concentration assumed to be negligible.
105	no2r	Nitrogen dioxide radical (intracellular)	cell	0	Initial concentration assumed to be negligible.
106	ex_no2r	Nitrogen dioxide radical (extracellular)	media	0	Initial concentration assumed to be negligible.
107	no3	Nitrate	cell	0	Initial concentration assumed to be negligible.
108	ex_no3	Nitrate	media	0	Initial concentration assumed to be negligible.
109	o2noo	Peroxynitrate	cell	0	Initial concentration assumed to be negligible.
110	onoo	Peroxynitrite	cell	0	Initial concentration assumed to be negligible.
111	onooh	Peroxynitrous acid	cell	0	Initial concentration assumed to be negligible.
112	ex_nonoate	1-Substituted diazen-1-ium-1,2-diolate (NO• donor)	media	0	Experimentally-controlled parameter. Initial concentration was set to zero for constant, ramp up and ramp down. Initial concentration was set to 120 µM, 360 µM and 480 µM for 6 µmol, 18 µmol and 24 µmol bolus respectively.
113	o2	Dissolved oxygen (in culture)	all	210	Initial concentration of O2 within the bioreactor was measured in the present study. In bioreactors containing cells, the concentration of oxygen dropped to ~180 uM at the time of NONOate delivery
114	o2_air	Dissolved oxygen (in equilibrium with air)	all	210†	Concentration of O2 in equilibrium with air [9]
115	o2s	Superoxide	cell	0.0001	Calculated based on superoxide dismutase concentration [10] and reaction kinetics [11], as well as the reported generation rate of 2.9 µM/s superoxide for E. coli grown in a minimal salts media [12].
116	ohr	Hydroxyl radical	cell	0	Initial concentration assumed to be negligible.
117	h2o2	Hydrogen peroxide	cell	0	Initial concentration set to zero because value does not influence reaction rates.
118	holo_protein_2fe2s	Holo [2Fe-2S] protein	cell	25	[5]
119	holo_protein_4fe4s	Holo [4Fe-4S] protein	cell	225	[5]
120	protein_2fe2s_2dnic	Protein-bound dinitrosyl iron complex	cell	0	Initial concentration assumed to be negligible.
121	protein_4fe4s_2rre	Protein-bound Roussin’s red ester	cell	0	Initial concentration assumed to be negligible.
122	apo_protein_2fe2s	Apo [2Fe-2S] protein	cell	0	Initial concentration assumed to be negligible.
123	apo_protein_4fe4s	Apo [4Fe-4S] protein	cell	0	Initial concentration assumed to be negligible.
124	cys_dnic	Cysteine-bound dinitrosyl iron complex	cell	0	Initial concentration assumed to be negligible.
125	fe2	Ferrous iron	cell	10	[13]
126	fdxox	ferredoxin (oxidized)	cell	0†	Initial concentration set to zero because value does not influence reaction rates.
127	fdxred	ferredoxin (reduced)	cell	0†	Initial concentration set to zero because value does not influence reaction rates.
128	s	Elemental sulfur	cell	0	Initial concentration set to zero because value does not influence reaction rates.
129	s2	Sulfide	cell	0	Initial concentration set to zero because value does not influence reaction rates.
130	iscs	Cysteine desulfurase	cell	1.37†	[5]
131	iscu	[Fe-S] cluster assembly scaffold protein (dimer)	cell	0.77	[5]
132	iscu_2s	2S-loaded form of IscU	cell	0	Initial concentration assumed to be negligible.
133	iscu_2fe2s	[2Fe-2S]-loaded form of IscU	cell	0	Initial concentration assumed to be negligible.
134	iscu_2fe2s_2s	[2Fe-2S]-loaded form of IscU, with 2S on other monomer	cell	0	Initial concentration assumed to be negligible.
135	iscu_2fe2s_2fe2s	IscU dimer with a [2Fe-2S] loaded on each monomer	cell	0	Initial concentration assumed to be negligible.
136	sod	Superoxide dismutase	cell	20†	[10]
137	trp	L-Tryptophan	cell	12	[1]
138	trpr	L-Tryptophanyl radical	cell	0	Initial concentration assumed to be negligible.
139	trpoh	5-Hydroxytryptophan	cell	0	Initial concentration assumed to be negligible.
140	trxox	Thioredoxin (oxidized)	cell	0	Initial concentration set to zero because value does not influence reaction rates.
141	trxrd	Thioredoxin (reduced)	cell	10	[5]
142	trxR	Thioredoxin reductase	cell	0.4193†	Calculated assuming a cellular volume of 3.2 × 10−15 L [14] and the reported value of 808 TrxR enzymes per cell [15].
143	tyr	L-Tyrosine	cell	29†	[1]
144	tyrrad	L-Tyrosyl radical	cell	0	Initial concentration assumed to be negligible.
145	tyrno	3-Nitrosotyrosine	cell	0	Initial concentration assumed to be negligible.
146	tyrno2	3-Nitrotyrosine	cell	0	Initial concentration assumed to be negligible.
147	dityr	3,3-Dityrosine	cell	0	Initial concentration assumed to be negligible.
148	q8	ubiquinone-8	cell	*	Refer to Table S5
149	q8h2	ubiquinol-8	cell	*	Refer to Table S5
150	NDH1	NADH dehydrogenase I	cell	*	Refer to Table S5
151	NDH2	NADH dehydrogenase II	cell	*	Refer to Table S5
152	mRNA_hmp	hmp mRNA transcript	cell	**	Value set based on HMP equilibrium assumption, refer to Supplementary Methods for further details
153	mRNA_norV	norV mRNA transcript	cell	0	Initial concentration assumed to be negligible.
154	mRNA_nrfA	nrfA mRNA transcript	cell	0	Initial concentration assumed to be negligible.
155	OD	Optical density of culture	all	0.05	Experimentally-controlled parameter. Initial OD600 of 0.025 and 0.05 were used in the present study.
156	cn	Cyanide	all	0	Experimentally-controlled parameter. Concentration of 0, 10 or 1000 µM of KCN were used in the present study.
157	cytbo_cn	Inhibited (CNˉ-bound) cytochrome bo	cell	0	Initial concentration assumed to be negligible.
158	cytbd_cn	Inhibited (CNˉ-bound) cytochrome bd	cell	0	Initial concentration assumed to be negligible.
References
1	Bennett BD, Kimball EH, Gao M, Osterhout R, Van Dien SJ, et al. (2009) Absolute metabolite concentrations and implied enzyme active site occupancy in Escherichia coli. Nat Chem Biol 5: 593-599.
2	Sander, R. (2015). Compilation of Henrys law constants (version 4.0) for water as solvent. Atmos. Chem. Phys. 15, 4399–4981.
3	Permentier, K., Vercammen, S., Soetaert, S., and Schellemans, C. (2017). Carbon dioxide poisoning: a literature review of an often forgotten cause of intoxication in the emergency department. Int J Emerg Med. 10.
4	Kim, C., Kim, J., Joo, S., Bu, Y., Liu, M., Cho, J., et al. (2018). Efficient CO2 Utilization via a Hybrid Na-CO2 System Based on CO2 Dissolution. iScience. 9, 278–285.
5	Robinson, J. L., and Brynildsen, M. P. (2016b). Discovery and dissection of metabolic oscillations in the microaerobic nitric oxide response network of Escherichia coli. Proc. Natl. Acad. Sci. 113, E1757–E1766.
6	Buckstein MH, He J, Rubin H (2008) Characterization of Nucleotide Pools as a Function of Physiological State in Escherichia coli. J Bacteriol 190: 718-726.
7	Kirsch M, Lehnig M, Korth HG, Sustmann R, de Groot H (2001) Inhibition of Peroxynitrite-Induced Nitration of Tyrosine by Glutathione in the Presence of Carbon Dioxide through both Radical Repair and Peroxynitrate Formation. Chemistry 7: 3313-3320.
8	Albe KR, Butler MH, Wright BE (1990) Cellular Concentrations of Enzymes and Their Substrates. J Theor Biol 143: 163-195.
9	Montgomery HAC, Thom NS, Cockburn A (2010) Determination of dissolved oxygen by the winkler method and the solubility of oxygen in pure water and sea water. J Appl Chem 14:280–296 . doi: 10.1002/jctb.5010140704
10	Imlay JA (2008) Cellular Defenses against Superoxide and Hydrogen Peroxide. Annu Rev Biochem 77: 755-776.
11	Falconi M, O'Neill P, Stroppolo ME, Desideri A (2002) Superoxide Dismutase Kinetics. Methods Enzymol 349: 38-49.
12	Imlay JA, Fridovich I (1991) Assay of Metabolic Superoxide Production in Escherichia coli. J Biol Chem 266: 6957-6965.
13	Keyer K, Imlay JA (1996) Superoxide accelerates DNA damage by elevating free-iron levels. Proc Natl Acad Sci U S A 93: 13635-13640.
14	Volkmer B, Heinemann M (2011) Condition-Dependent Cell Volume and Concentration of Escherichia coli to Facilitate Data Conversion for Systems Biology Modeling. PLoS One 6: e23126.
15	Sundararaj S, Guo A, Habibi-Nazhad B, Rouani M, Stothard P, et al. (2004) The CyberCell Database (CCDB): a comprehensive, self-updating, relational database to coordinate and facilitate in silico modeling of Escherichia coli. Nucleic Acids Res 32: D293-295.
